# Supplementary material
Source: PubMed Central journal article supplement (PMC2224217)

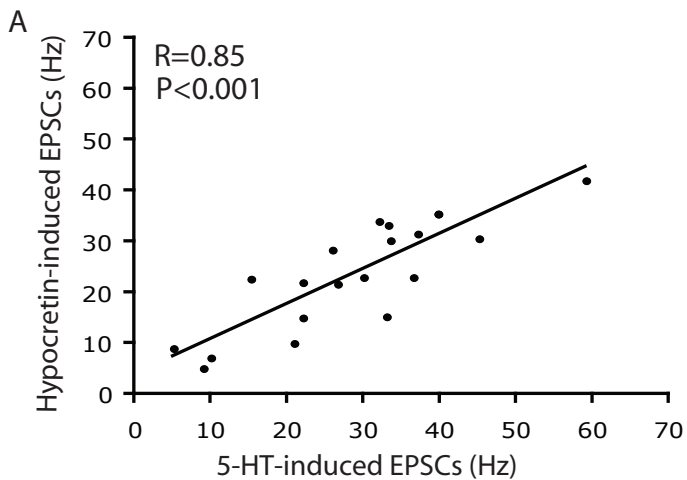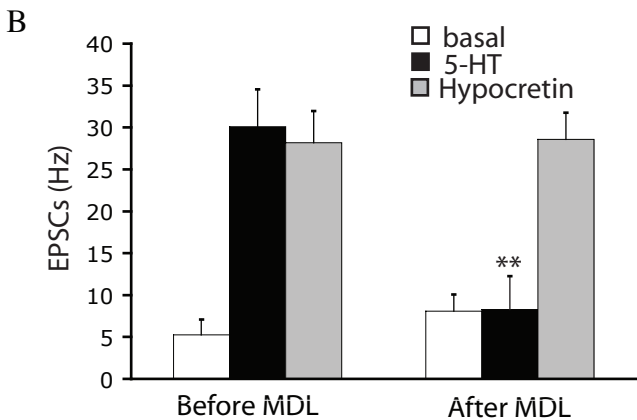

Supplement: pnas_0706679105_1.pdf [file pnas_0706679105_1.pdf]

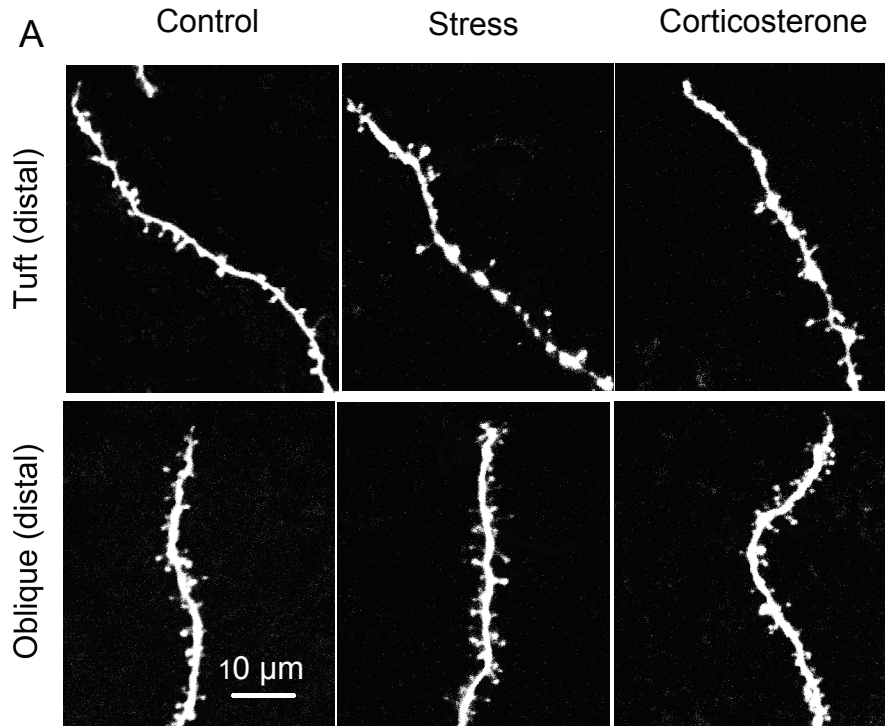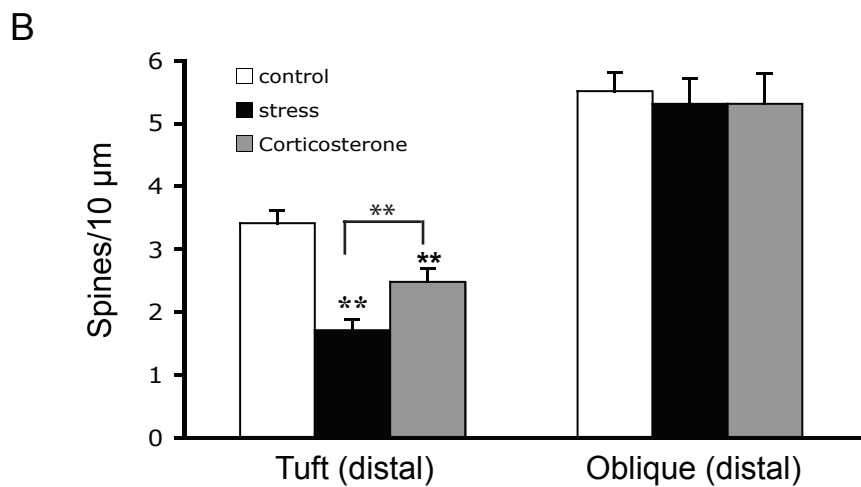

Supplement: pnas_0706679105_2.pdf [file pnas_0706679105_2.pdf]
